# Supplementary material for: Evaluation of targeting c-Src by the RGT-containing peptide as a novel antithrombotic strategy
Source: J Hematol Oncol. 2015 May 30;8:62. doi: 10.1186/s13045-015-0159-8 (PMC4459659; doi:10.1186/s13045-015-0159-8)
Supplement: Additional file 6: Table S1. — The integrin β3 cytoplasmic peptides (wild type or differently mutated). [file 13045_2015_159_MOESM6_ESM.xlsx]

## Sheet: Sheet1
Additional Table 1: The integrin β3 cytoplasmic peptides (wild type or differently mutated)
peptide	sequence
b3 (wild type)	DTANNPLYKEATSTFTNITYRGT
b3 Y747F	DTANNPLFKEATSTFTNITYRGT
b3 Y759F	DTANNPLYKEATSTFTNITFRGT
b3 Y747, 759F	DTANNPLFKEATSTFTNITFRGT
b3-DRGT	DTANNPLYKEATSTFTNITY
b3-DRGT Y747F	DTANNPLFKEATSTFTNITY
b3-DRGT Y759F	DTANNPLYKEATSTFTNITF
